# Supplementary material
Source: publisher site journal article supplement (https://www.dovepress.com/get_supplementary_file.php?f=207910-Table-2.docx)
Supplement: Supplementary file 1 [file get_supplementary_file.php]

| **Supplemental Table 2.** PANSS Total Score Responder Rates (Across Reduction Thresholds of 20% to 50%) and NNT vs. Placebo (ITT, LOCF) at Day 85 for AL 441 mg, AL 882 mg Monthly Dosing and for AL Doses Pooled | | | | | | | | | | | |
| --- | --- | --- | --- | --- | --- | --- | --- | --- | --- | --- | --- |
|  | Placebo (n=196) |  | AL 441 mg (n=196) | |  | AL 882 mg (n=204) | | |  | AL Pooled  (n=400) | |
| PANSS Reduction Threshold* | n (%) |  | n (%) | NNT (95% CI) |  | | n (%) | NNT (95% CI) |  | n (%) | NNT (95% CI) |
| ≥20% | 54 (27.6) |  | 109 (55.6) | 4 (3-6) |  | | 112 (54.9) | 4 (3-6) |  | 221 (55.3) | 4 (3-6) |
| ≥30% | 36 (18.4) |  | 70 (35.7) | 6 (4-12) |  | | 71 (34.8) | 7 (4-13) |  | 141 (35.3) | 6 (5-11) |
| ≥40% | 15 (7.7) |  | 37 (18.9) | 9 (6-22) |  | | 35 (17.2) | 11 (7-32) |  | 72 (18.0) | 10 (7-20) |
| ≥50% | 6 (3.1) |  | 13 (6.6) | 28 (ns) |  | | 15 (7.4) | 24 (ns) |  | 28 (7.0) | 26 (14-216) |
| *Calculated as [PANSS total score at baseline − PANSS total score at LOCF endpoint] ÷ [PANSS total score at baseline].  AL, aripiprazole lauroxil; CI, confidence interval; ITT, intent-to-treat population; LOCF, last observation carried forward; NNT, number needed to treat; ns, not significant at the *P*<0.05 threshold; thus the 95% CI is not shown; PANSS, Positive and Negative Syndrome Scale. | | | | | | | | | | | |
